# Supplementary material
Source: PubMed Central journal article supplement (PMC11385875)
Supplement: PBI-19-74-s001.pdf [file PBI-19-74-s001.pdf]

## **Supporting information**

**A**

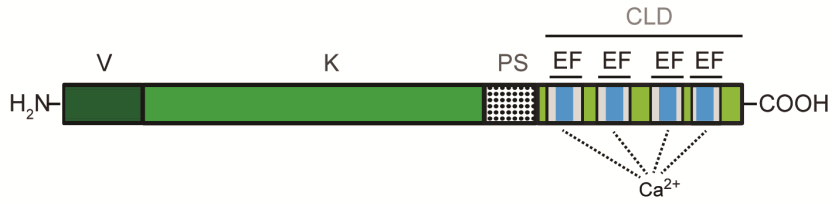

**B**

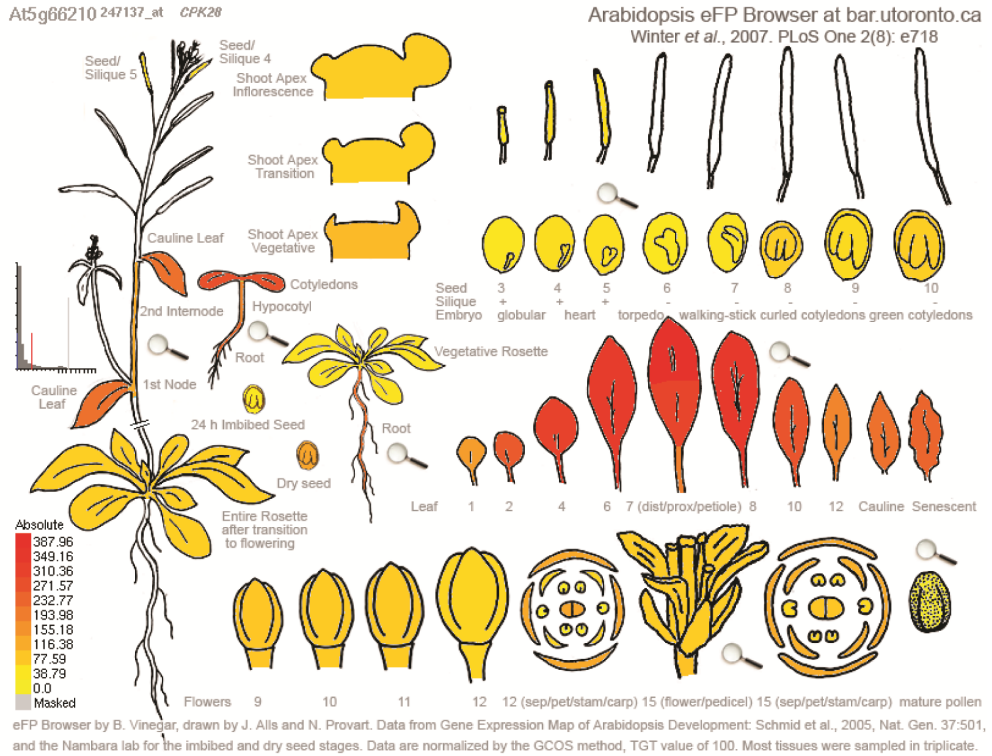

**C**

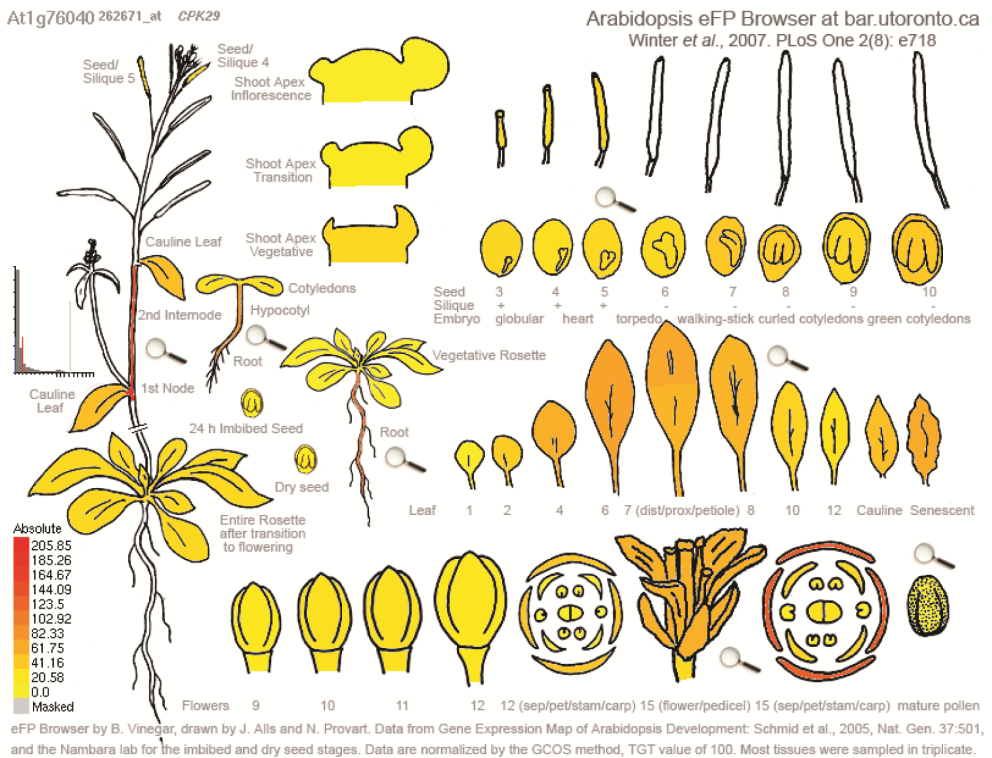

**Figure S1** Protein structure and expression patterns of CPK28 and CPK29 from *Arabidopsis*. (A) Schematic representation of the domain organization of CPK28 and CPK29. The proteins contain the CPK-typical variable (V), kinase (K), pseudosubstrate (PS) and calmodulin-like (CLD) domains. The CLD harbors several Ca<sup>2+</sup>-binding EF-hand motifs. (B) Expression pattern of *CPK28*. (C) Expression pattern of *CPK29*. Data were extracted from the eFP Browser (Winter et al., 2007). The expression profiles of the two genes show some overlap, but *CPK29* expression in leaves of all developmental stages is substantially lower than *CPK28* expression.

**A**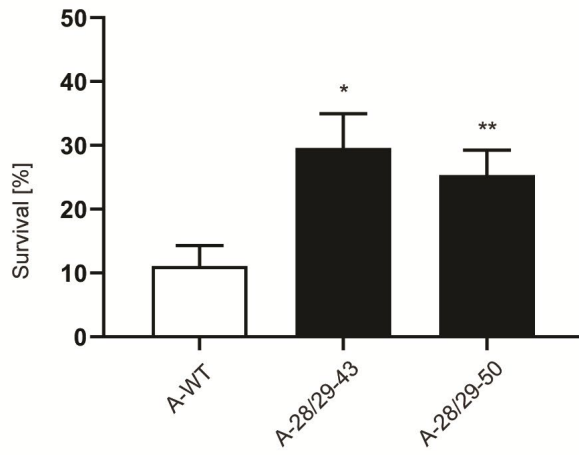**B**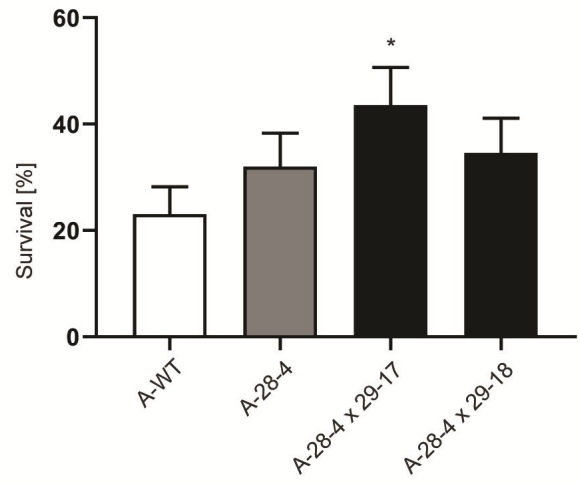**C**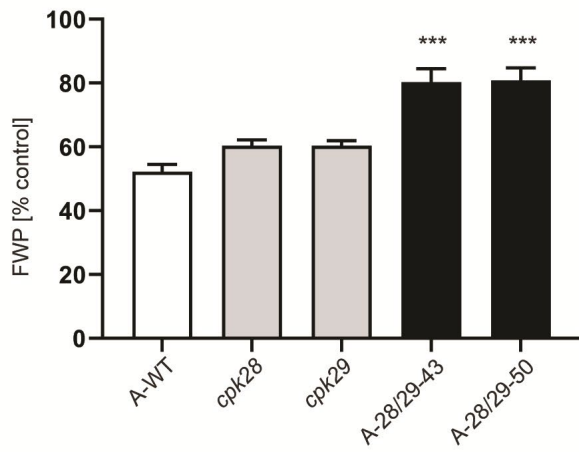**D**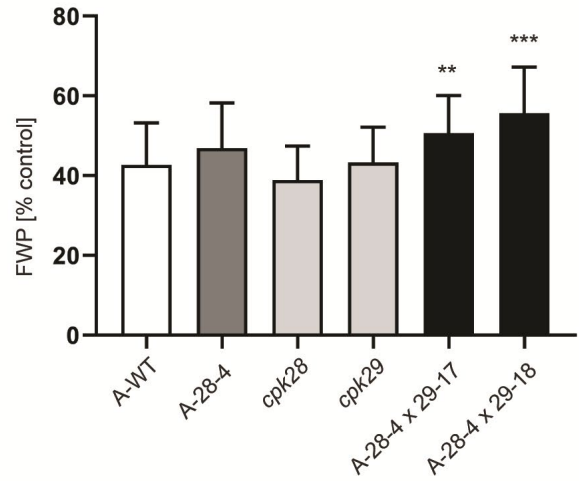**E**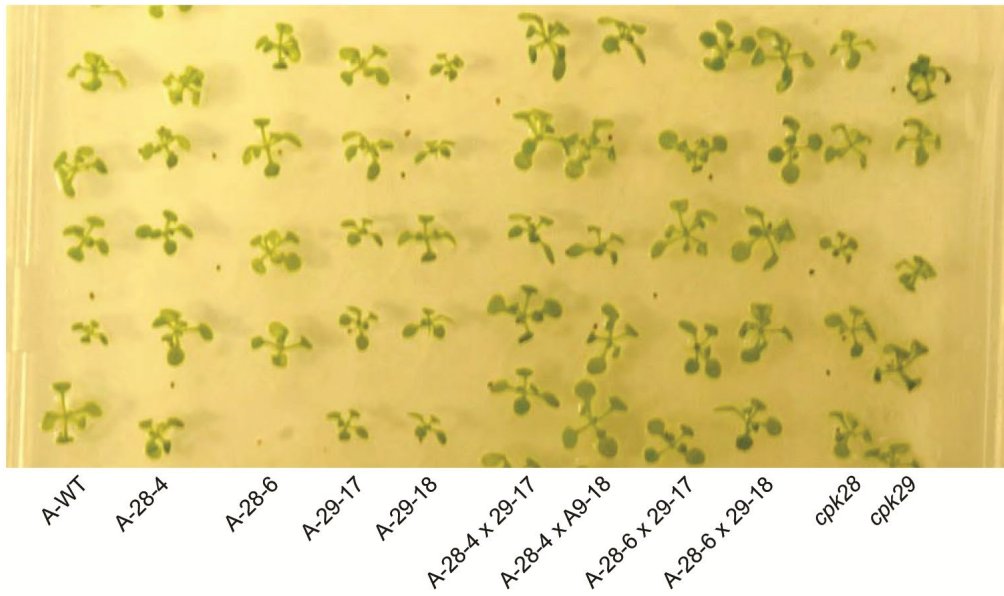

**Figure S2** Stress tolerance tests with additional A-28/29 and A-28 x A-29 lines. (A) Increased survival rate of additional transgenic lines produced by transformation with vector pA-28/29 (cf. Figure 2). (B) Enhanced survival of transgenic lines obtained from crosses of A-28 with A-29 lines (A-28 x 29). (C) Increased biomass production of A-28/29 lines grown under mild osmotic stress (35 mM mannitol). (D) Increased biomass production (FWP, fresh weight per plant) of A-28 x 29 lines grown under mild osmotic stress. Asterisks indicate statistically significant differences between transgenic lines and the wild type as determined by a two-tailed unpaired t-test (\* =  $p < 0.05$ , \*\* =  $p < 0.01$ , \*\*\* =  $p < 0.001$ ). All data are presented as means  $\pm$  SD from three independent experiments (A: n=9 biological replicates, with 3 plants per line in each replicate; B: n=26 biological replicates, with 3 plants per line in each replicate; C: n=4-12 biological replicates, with 10 plants per line and condition in each replicate; D: n=10 biological replicates for the 2 mutant lines and n=20 for all other lines, with 10 plants per line and condition in each replicate). (E) Representative image of an osmotic stress assay (in the presence of 35 mM mannitol) showing improved growth in the progeny of all of the four different A-28 x A-29 crosses. For comparison, *cpk28* and *cpk29* knock-out mutants were also included.

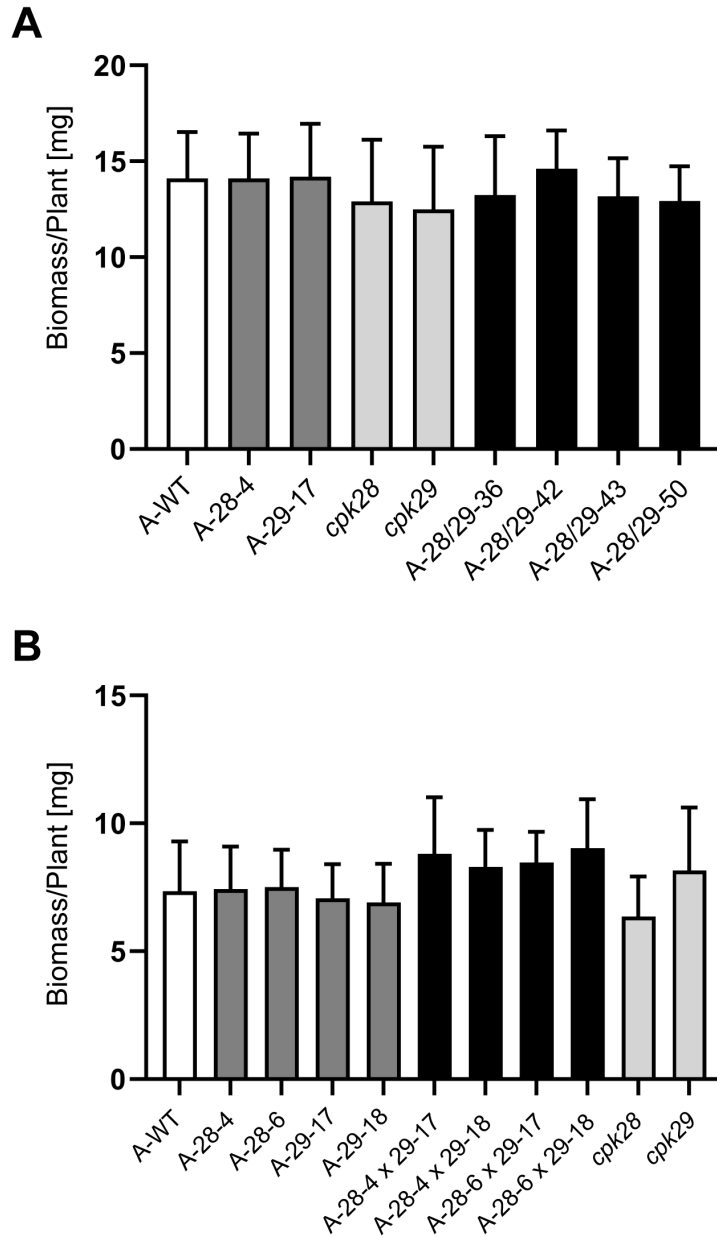

**Figure S3** The gene combination *CPK28* and *CPK29* has no impact on plant biomass production under control conditions in *Arabidopsis*. (A) Biomass under control conditions of the plants used in Figure 2F and Figure S2C. (B) Biomass under control conditions of the plants used in Figure 2G and Figure S2D. No statistically significant differences are found by one-way ANOVA.

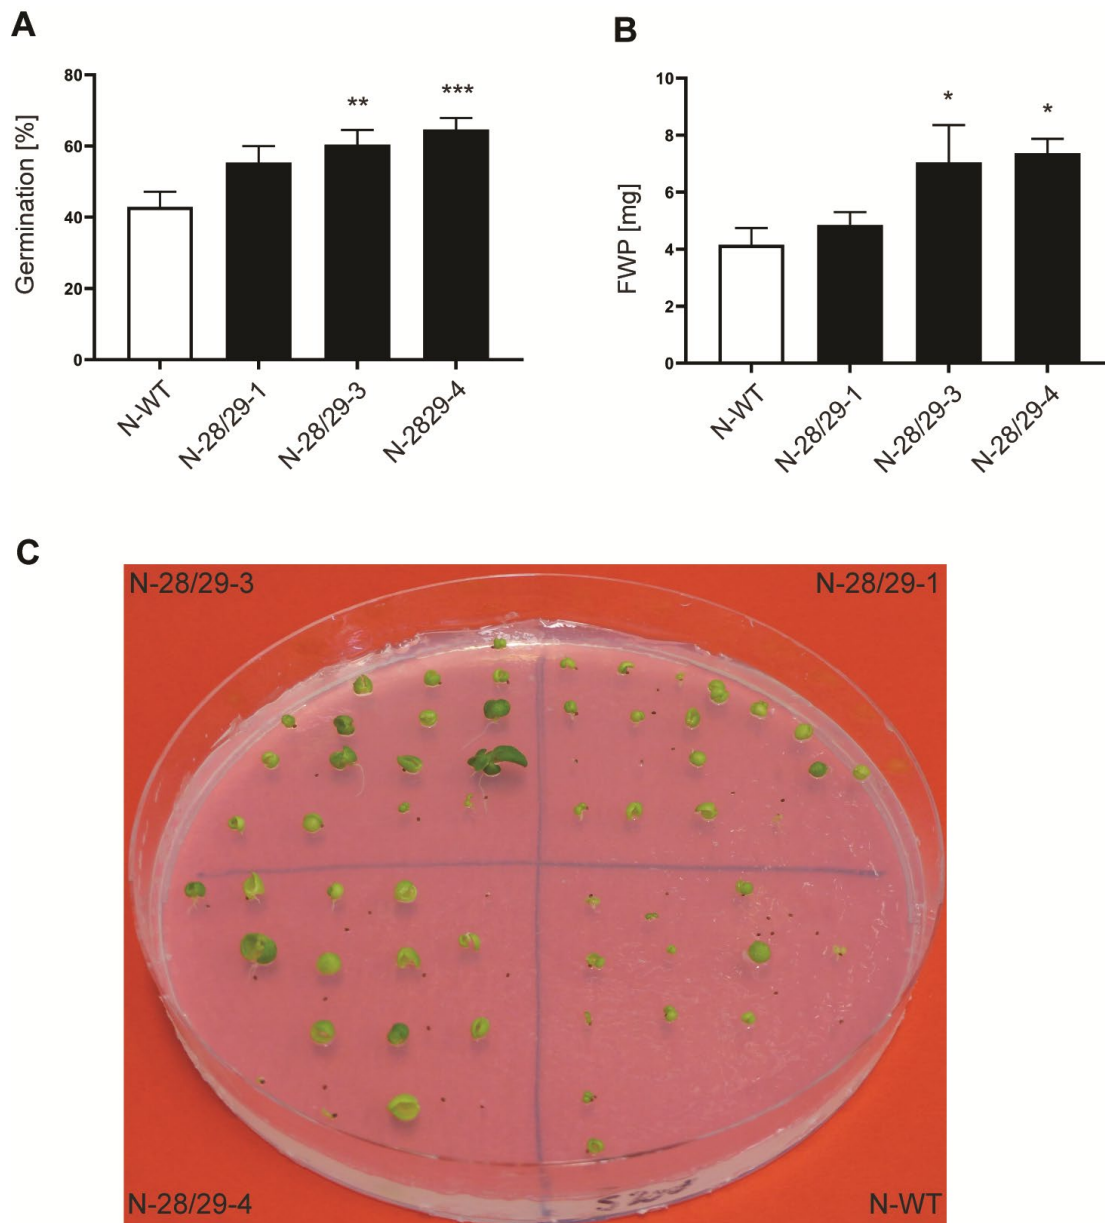

**Figure S4** The CPK28/29 module confers tolerance to salt stress. (A) Improved seed germination of the N28/29-3 and N-28/29-4 lines compared to the wild type in the presence of 200 mM NaCl. Germination rates were scored after 21 days. (B) Enhanced biomass production of lines N-28/29-3 and N-28/29-4 compared to the wild type after 28 days of growth in the presence of 200 mM NaCl. (C) Representative picture of a germination assay on medium with 200 mM NaCl after 21 days. Asterisks indicate statistically significant differences between transgenic lines and the wild type as determined by two-tailed unpaired t-tests (\* =  $p < 0.05$ , \*\* =  $p < 0.01$ , \*\*\* =  $p < 0.001$ ).

All data are presented as means  $\pm$  SD from three independent experiments (A: n=28 biological replicates, each with 16 seeds per line; B: n=10 biological replicates, each with up to 16 seedlings per line).



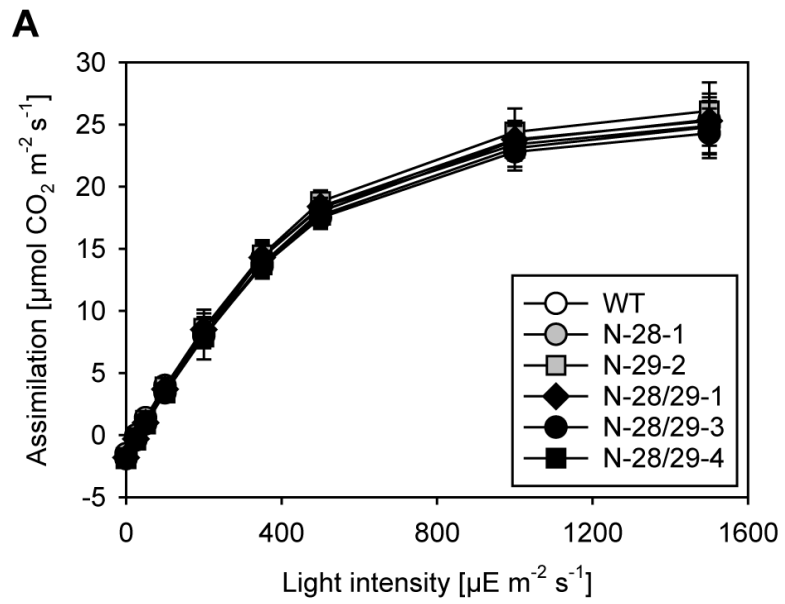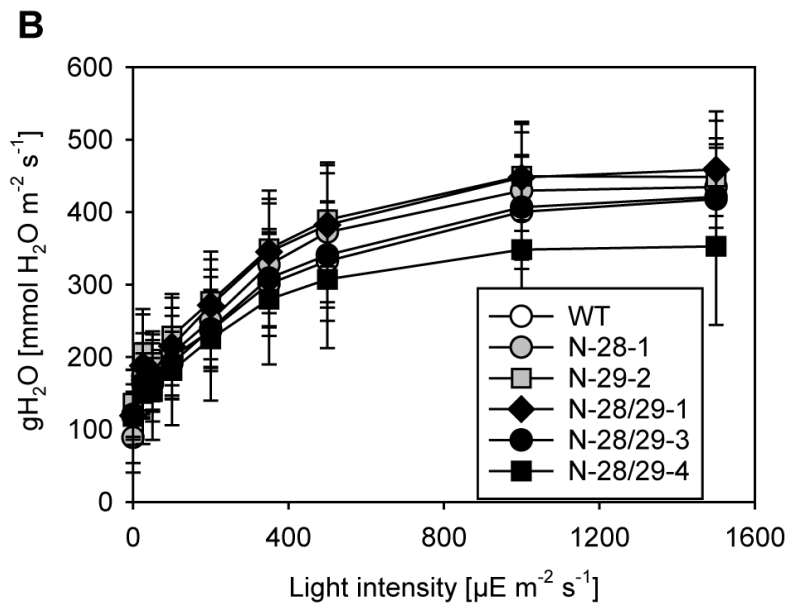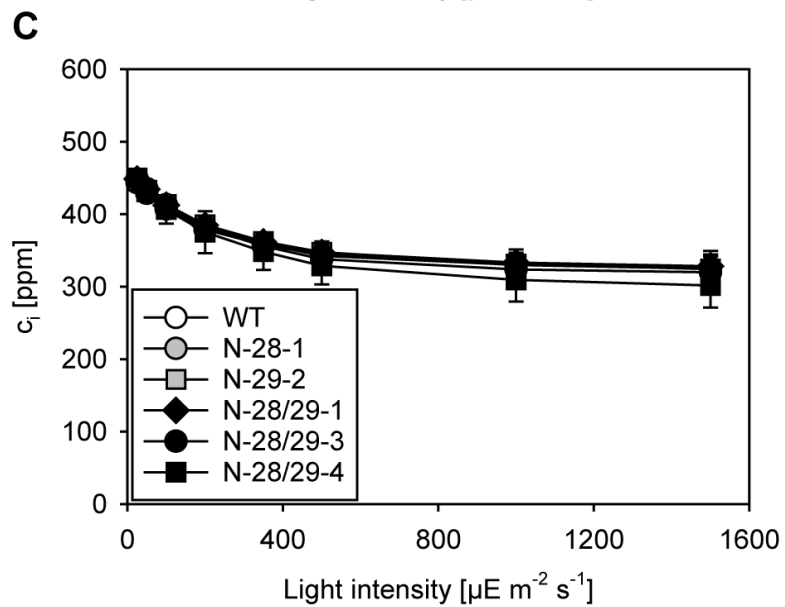

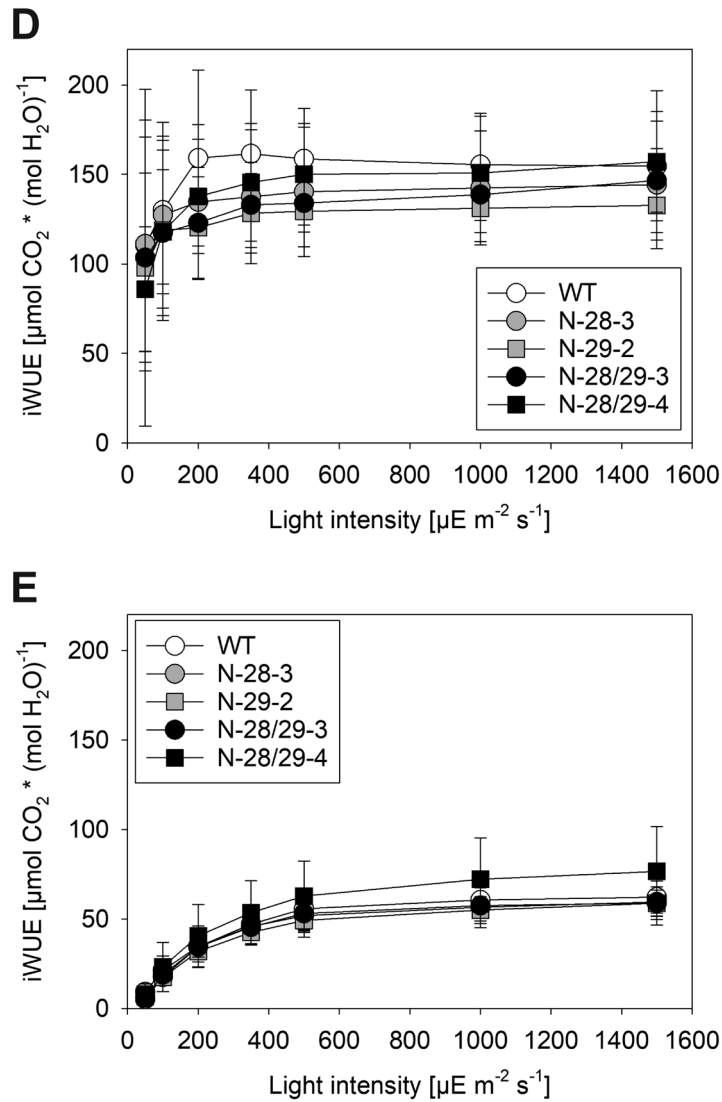

**Figure S5** Expression of *CPK28* and *CPK29* has no impact on gas exchange in control conditions. (A) Measurement of photosynthetic assimilation capacity. (B) Measurement of stomatal conductance. (C) Measurement of the internal  $\text{CO}_2$  concentration in leaves. WT: wild-type tobacco plants. No statistically significant differences can be detected between lines grown under the same conditions (determined by one-way ANOVA). All data are presented as means  $\pm$  SD from two independent experiments ( $n=11, 10, 9, 6, 10$  and  $10$  biological replicates for WT, N-28-1, N-29-2, N-28/29-1, N-28/29-3 and N-28/29-4, respectively). (D,E) Intrinsic water-use efficiency (iWUE) under water-limited conditions (D; cf. Figure 4), and under control conditions (E). For details, see Experimental procedures.

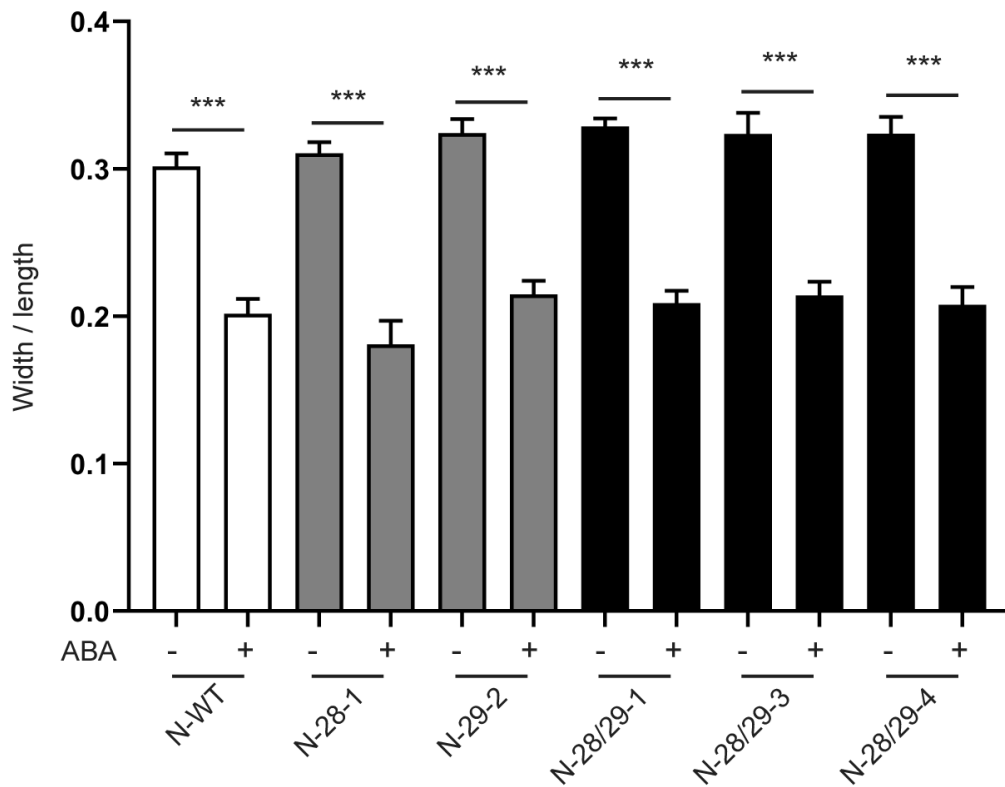

**Figure S6** Expression of *CPK28* and *CPK29* has no impact on stomatal responses to ABA. Stomatal width/length ratios were determined after incubation in stomatal opening solution for two hours and an additional two-hour incubation with or without 10  $\mu$ M ABA. The asterisks indicate statistically significant differences between the lines with and without ABA treatment as determined by one-way ANOVA followed by Tukey's multiple test (\*\*\*) =  $p < 0.001$ ). All data are presented as means  $\pm$  SD of n=19/31, 18/21, 14/23, 24/34, 16/19 and 14/18 stomata measured without/ with ABA from N-WT, N-28-1, N-29-2, N28/29-1, N-28/29-3 and N28/29-4, respectively.

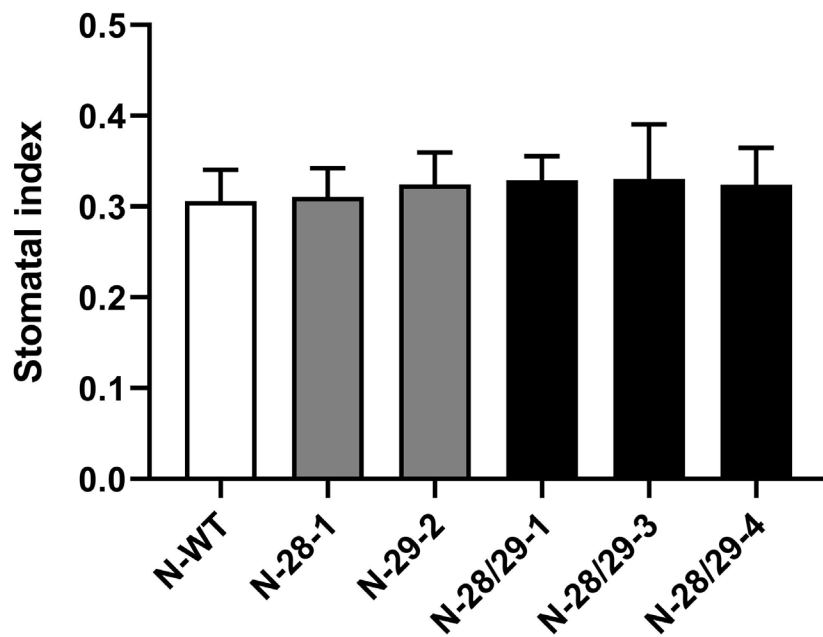

**Figure S7** Expression of *CPK28* and *CPK29* does not alter the stomatal index. Guard cell number per total cell number was determined based on microscopic images of non-stressed plants (cf. Figure S6). At least 30 cells per image were counted. Data are presented as means  $\pm$  SD of n=19, 18, 14, 24, 16 and 14 images from N-WT, N-28-1, N-29-2, N28/29-1, N-28/29-3 and N28/29-4, respectively.

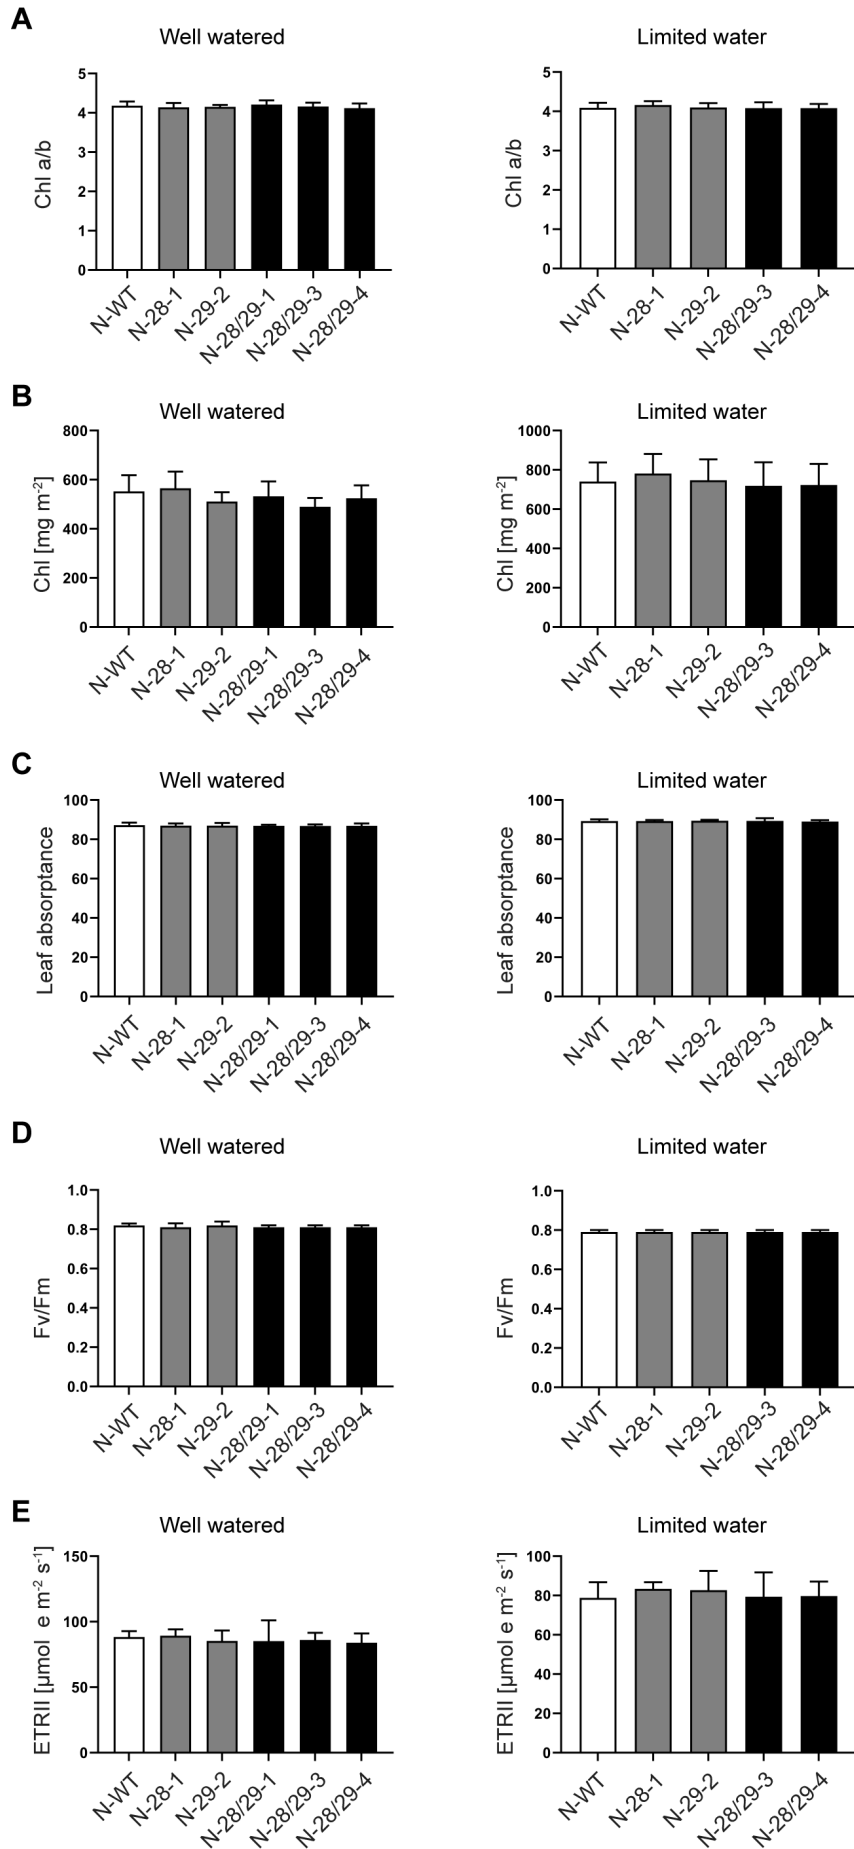

**Figure S8** Expression of *CPK28* and *CPK29* has no impact on photosynthetic parameters measured in plants grown under well-watered conditions *versus* plants exposed to mild water-limited conditions. (A) Chlorophyll a:b ratio. (B) Total chlorophyll content per leaf area. (C) Leaf absorptance. (D) Maximum quantum efficiency of photosystem II in the dark-adapted state ( $F_v/F_m$ ). (E) Electron transport capacity of PSII (ETR<sub>II</sub>). No statistically significant differences between the lines grown in the same conditions were detectable (determined by one-way ANOVA). All data are presented as means  $\pm$  SD from two independent experiments (n=11, 10, 9, 6, 10 and 10 biological replicates in control conditions for N-WT, N-28-1, N-29-2, N28/29-1, N28/29-3 and N-28/29-4, respectively; and n=8, 8, 8, 8 and 7 biological replicates in water-limiting conditions for N-WT, N-28-1, N-29-2, N28/29-3 and N-28/29-4, respectively).

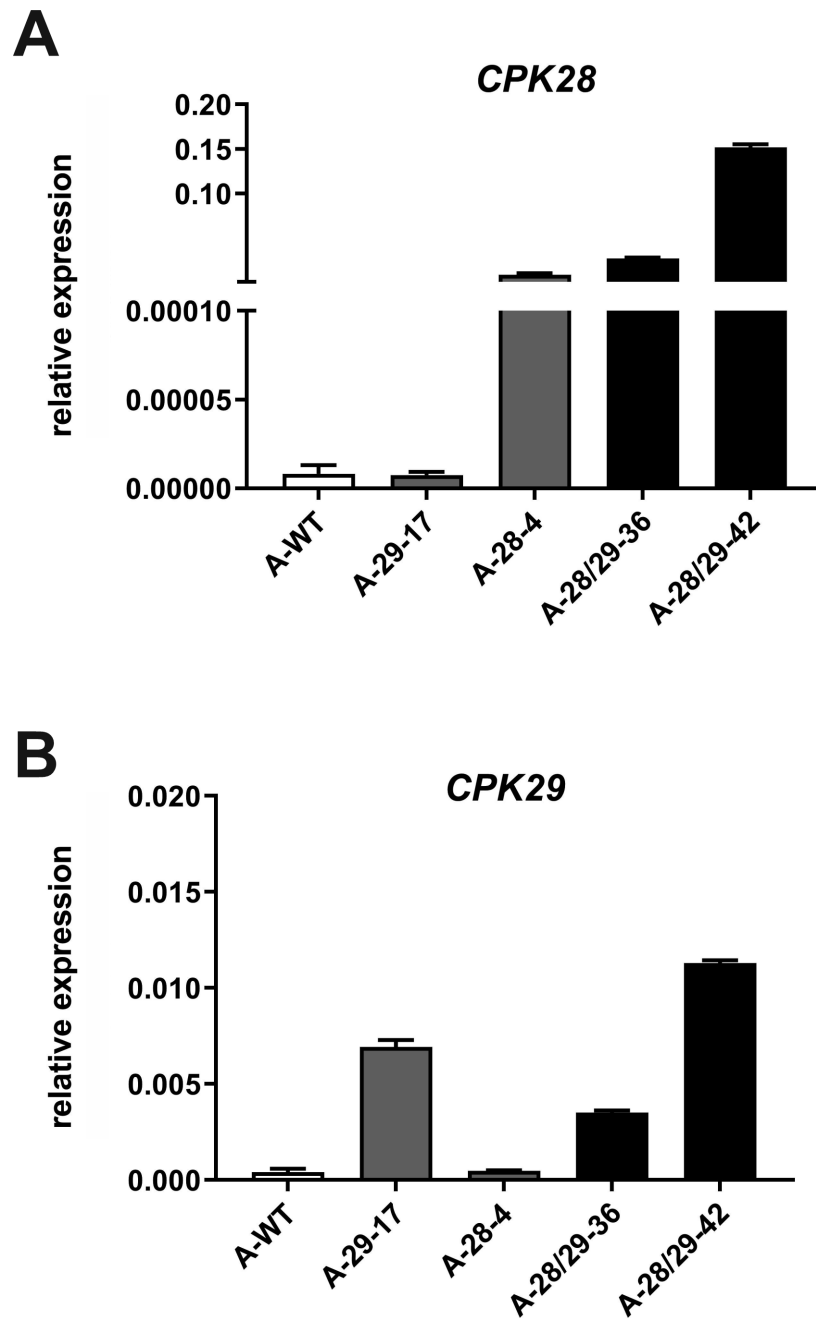

**Figure S9** Expression of *CPK28* (A) and *CPK29* (B) in wild-type and transgenic *Arabidopsis* seedlings as determined by qRT-PCR analyses. Three biological replicates were measured and relative expression levels are shown (using *ACT2* as reference gene). Data are presented as means  $\pm$  SD.

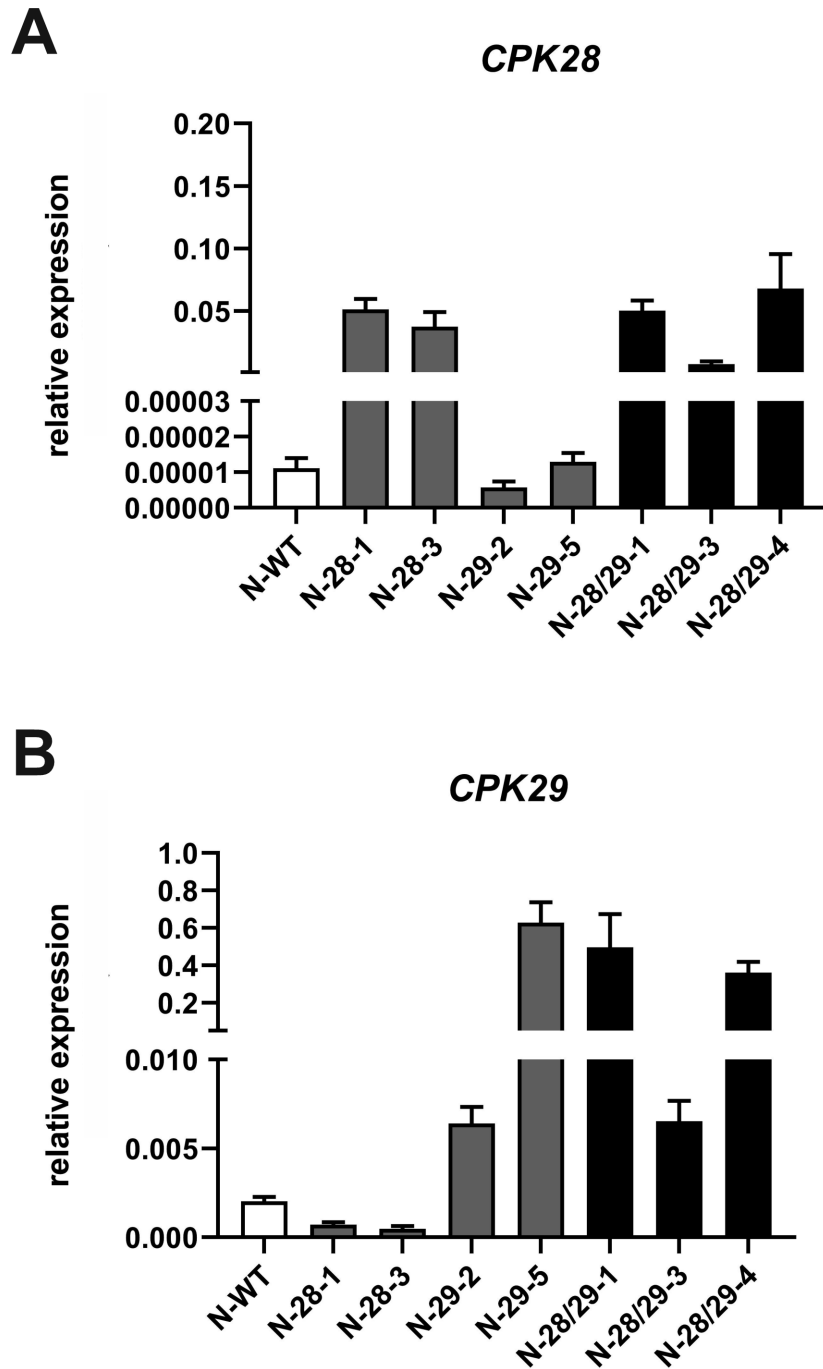

**Figure S10** Expression of *CPK28* (A) and *CPK29* (B) in wild-type and transgenic tobacco seedlings as determined by qRT-PCR analyses. Six biological replicates were measured and relative expression levels are shown (using *UBQ* as reference gene). Data are presented as means  $\pm$  SD.



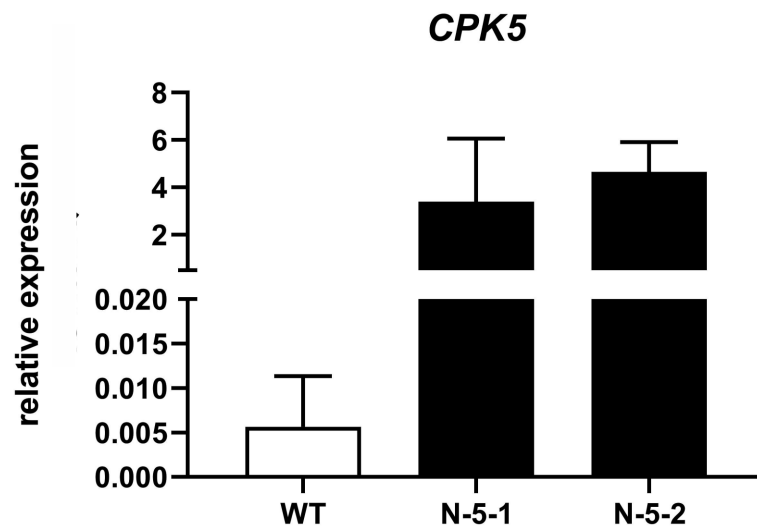

**Figure S11** Expression of *CPK5* in wild-type and transgenic tobacco seedlings as determined by qRT-PCR analysis. Three biological replicates were measured and relative expression levels are shown (using *UBQ* as reference gene). Data are presented as means  $\pm$  SD.

**Table S1** Representation of *CPK3* and *CPK29* in combinatorially transformed tobacco lines exhibiting drought tolerance.

| <b>Gene</b>        | <b>Presence in all lines</b> | <b>Presence in tolerant lines</b> | <b>Expected random frequency</b> | <b>Detected frequency in tolerant lines</b> |
|--------------------|------------------------------|-----------------------------------|----------------------------------|---------------------------------------------|
| CPK3<br>AT4G23650  | 20 / 103                     | 4 / 9                             | 19.5%                            | 44.4%                                       |
| CPK29<br>AT1G76040 | 23 / 103                     | 5 / 9                             | 22.3%                            | 55.5%                                       |

**Table S2** Genotyping of drought-tolerant segregants from crosses of hemizygous N-28 with N-29 lines. \*\*\*\* : <0.0001; \*\*\* : <0.001; \*\* : <0.01; ns: not significant.

| <b>Cross</b>    | <b>Offspring tested</b> | <b>Survivors</b> | <b>Both alleles expected [%]</b> | <b>Both alleles found [%]</b> | <b>Chi-square test</b> |
|-----------------|-------------------------|------------------|----------------------------------|-------------------------------|------------------------|
| N-28-1 x N-29-2 | 109                     | 13               | 25                               | 46                            | ****                   |
| N-28-3 x N-29-2 | 121                     | 17               | 25                               | 41                            | **                     |
| N-28-9 x N-29-5 | 58                      | 14               | 25                               | 43                            | ***                    |
| N-28-9 x N-29-2 | 52                      | 12               | 25                               | 33                            | ns                     |

**Table S3** List of oligonucleotides used in this study.

| <b>Primer name</b> | <b>DNA target</b> | <b>Sequence 5' - 3'</b>               |
|--------------------|-------------------|---------------------------------------|
| PS_057             | CPK1-fw           | TTTTACTAGTAAAATGGGTAATACTTGTGTTGGAC   |
| PS_058             | CPK1-rev          | AAAACCCGGGCTAGAGTTTAAGAGCAATGCTAAAG   |
| PS_059             | CPK3-fw           | TTTTACTAGTAAAATGGGCCACAGACACAGC       |
| PS_060             | CPK3-rev          | AAAACCCGGGTCACATTCTGCGTCGGTTTG        |
| PS_061             | CPK4-fw           | TTTTACTAGTAAAATGGAGAAACCAAACCTAGAA    |
| PS_062             | CPK4-rev          | AAAACCCGGGTTACTTTGGTGAATCATCAGATTTAG  |
| PS_063             | CPK5-fw           | TTTTACTAGTAAAATGGGCAATTCTTGCCGTGG     |
| PS_064             | CPK5-rev          | AAAACCCGGGCTACGCGTCTCTCATGCTAATG      |
| PS_065             | CPK6-fw           | TTTTACTAGTAAAATGGGCAATTCATGTCGTGG     |
| PS_066             | CPK6-rev          | TTTCCCGGGCTACACATCTCTCATGC            |
| PS_067             | CPK8-fw           | TTTTACTAGTAAAATGGGAAATTGTTGTGCGAGC    |
| PS_068             | CPK8-rev          | AAAAGTCGACTTAATTTTCGCTTCTAATTGCAAT    |
| PS_069             | CPK9-fw           | TTTTACTAGTAAAATGGGAAATTGTTTTGCCAAGAAC |
| PS_070             | CPK9-rev          | AAAACCCGGGCTAGAACAGCCGAGGTTGTT        |
| PS_071             | CPK10-fw          | TTTTACTAGTAAAATGGGTAAGTGTAAACGCCTG    |
| PS_072             | CPK10-rev         | AAAACCCGGGTTAAACAGGAACAGTTTGTCCAGTG   |
| PS_073             | CPK11-fw          | TTTTACTAGTAAAATGGAGACGAAGCCAAACCC     |
| PS_074             | CPK11-rev         | AAAACCCGGGTCAGTCATCAGATTTTTCACCATC    |
| PS_075             | CPK15-fw          | TTTTACTAGTAAAATGGGTTGCTTTAGCAGCAAAC   |
| PS_076             | CPK15-rev         | AAAACCCGGGCTAGTTTAAGTCAGCAACTCTTTTG   |
| PS_077             | CPK21-fw          | TTTTACTAGTAAAATGGGTTGCTTCAGCAGTAAAC   |
| PS_078             | CPK21-rev         | AAAACCCGGGTCAATGGAATGGAAGCAGTTTC      |
| PS_079             | CPK28-fw          | TTTTACTAGTAAAATGGGTGTCTGTTTCTCCGC     |
| PS_080             | CPK28-rev         | AAAACCCGGGCTATCGAAGATTCCTGTGACC       |

|        |                          |                                                                  |
|--------|--------------------------|------------------------------------------------------------------|
| PS_081 | CPK29-fw                 | TTTTACTAGTAAAATGCTTCAAACCAACATAAAACG<br>ACC                      |
| PS_082 | CPK29-rev                | AAAACCCGGGTCATCTGATCAGCTTTGGATCTGAATC                            |
| PS_083 | CPK30-fw                 | TTTTACTAGTAAAATGGGTAATTGTATCGCCTGC                               |
| PS_084 | CPK30-rev                | AAAACCCGGGTCAAACTGCAATAGATTGTCCAG                                |
| PS_085 | CPK32-fw                 | TTTTACTAGTAAAATGGGTAATTGTTGCGGAACAG                              |
| PS_086 | CPK32-rev                | AAAACCCGGGTCATCTTGTATCACCATTGACCTG                               |
| P3687  | pXCS_TALEN_1-fw          | GACCTTGCTCGAGTAATCGATGCGGTACCTCACGCGTA<br>CGAGCT                 |
| P3688  | pXCS_TALEN_1-rev         | CGTACGCGTGAGGTACCGCATCGATTACTCGAGCAAG                            |
| P3689  | UBQ_NotI-fw              | TAAGCGGCCGCGTCGACGAGTCAGTAATAA                                   |
| P3690  | UBQ_PmeI-rev             | TAGTTTAAACGACGTCCATATGCCCGGGACCGGTGAA<br>TTCCTGTTAATCAGAAAACTCAG |
| P3691  | Term_AatII-fw            | ATCGACGTCTATATGAAGATGAAGATGAAA                                   |
| P3692  | Term_PmeI-rev            | ATAGTTTAAACCTTATCTTTAATCATATTCC                                  |
| P3742  | pcUBQ-sense              | TATGGCGCGCCAAAAATTACGGATATGAATATAGGC                             |
| P3743  | pcUBQ-antisense          | ATAAGGTCCTGCTGCACATACATAACATATCA                                 |
| P3974  | 35S_NotI_sense           | TAAGCGGCCGCGAGATTAGCCTTTTCAATTCAGAAAG<br>AA                      |
| P3975  | 35S_EcoRI_antisense      | ATAGAATTCCGTGTTCTCTCCAAATGAAATG                                  |
| P4762  | CPK28_EcoRI-fw           | GAATTCATGGGTGTCTGTTTCTCCG                                        |
| P4763  | CPK28_XmaI-rev           | CCCGGGCTATCGAAGATTCCTGTGACC                                      |
| P4758  | CPK29_EcoRI-fw           | GAATTCATGCTTCAAACCAACATAA                                        |
| P4759  | CPK29_XmaI-rev           | CCCGGGTCATCTGATCAGCTTTGGATC                                      |
| P4760  | CPK29_KpnI_pcUBQ-<br>fw  | GGTACCATGCTTCAAACCAACATAA                                        |
| P4761  | CPK29_KpnI_pcUBQ-<br>rev | GGTACCTCATCTGATCAGCTTTGGATC                                      |
| P5149  | CPK28_XmaI-rev           | CCCGGGCTATCGAAGATTCCTGTGA                                        |
| P5152  | AtUBQ-fw                 | GGATCCGGCCGCGTCGACGAGTCA                                         |
| P5151  | CPK29_XmaI-rev           | CCCGGGGTACCTCATCTGATCAGCTTT                                      |
| P5150  | 35S_BamHI-fw             | GGATCCGGTCTCAGAAGACCAGAGG                                        |
| P2372  | AtCPK5 BamH1 fw          | AAGGATCCATGGGCAATTCTTGCCGTG                                      |
| P2373  | StrepII tag SacI rev     | AAGAGCTCTTATTTTTCAAATTGAGGATGAGAC                                |
| P2427  | qRT CPK28f               | CGATACCAAGGCCTCTACCA                                             |

|       |            |                      |
|-------|------------|----------------------|
| P2428 | qRT CPK28r | GCCGATGGTGTAGTGATCGT |
| P5095 | qRT CPK29f | ATGGAAGCTGCTGATGTGG  |
| P5096 | qRT CPK29r | ATGACGATGCATTGTTGCAG |
| P3585 | qRT CPK5f  | TAACAGCGGGGCAATCACAT |
| P3586 | qRT CPK5r  | GTCTACATCAGCCGCATCCA |
